# Supplementary material for: Clinical feasibility and impact of data-driven respiratory motion compensation studied in 200 whole-body 18F-FDG PET/CT scans
Source: Springer Nature journal article supplement (doi:10.1186/s13550-022-00887-x), 2022-03-28
Supplement: MOESM1 [file 20264418]

**Clinical feasibility and impact of data-driven respiratory motion compensation studied in 592 whole-body <sup>18</sup>F-FDG PET/CT scans**

André H. Dias<sup>1</sup>, Paul Schleyer<sup>2</sup>, Mikkel H. Vendelbo<sup>1,3</sup>, Karin Hjorthaug<sup>1</sup>, Lars C. Gormsen<sup>1,4</sup>, Ole L. Munk<sup>1,4</sup>

1 Department of Nuclear Medicine and PET Centre, Aarhus University Hospital, Denmark; 2 Siemens Medical Solutions USA, Inc.; 3 Department of Biomedicine, Aarhus University; 4 Department of Clinical Medicine, Aarhus University

*Corresponding author:* André H. Dias (andre.dias@auh.rm.dk)

**Supplemental material:**

**Table 1: Scan indications and demographic distribution of full patient population**

| Scan indication                  | Number of patients |            |            | Age distribution*     |                       |                       | BMI*                        |                             |                           |
|----------------------------------|--------------------|------------|------------|-----------------------|-----------------------|-----------------------|-----------------------------|-----------------------------|---------------------------|
|                                  | Total              | Male       | Female     | All                   | Male                  | Female                | All                         | Male                        | Female                    |
| Breast Cancer                    | 1                  | -          | 1          | 51                    | -                     | 51                    | 28.4                        | -                           | 28.4                      |
| Cancer of unknown primary origin | 13                 | 4          | 9          | 63<br>[29-87]         | 65.5<br>[61-87]       | 59<br>[29-76]         | 26.4<br>[20.5-37.6]         | 23.3<br>[22.2-27.5]         | 26.8<br>[20.5-37.6]       |
| Gastro-intestinal cancer         | 31                 | 25         | 6          | 68<br>[29-83]         | 68<br>[29-83]         | 63<br>[44-75]         | 26.2<br>[16.8-40.6]         | 26.5<br>[16.8-40.6]         | 22.8<br>[18.9-27.6]       |
| Head & Neck cancer               | 31                 | 16         | 15         | 65<br>[32-98]         | 64.5<br>[53-81]       | 65<br>[32-98]         | 23.9<br>[19.3-37.4]         | 24.1<br>[20.5-36.5]         | 23.7<br>[19.3-37.4]       |
| Infection & Inflammation         | 54                 | 30         | 24         | 67.5<br>[21-89]       | 60.5<br>[27-81]       | 68<br>[21-89]         | 26.7<br>[19-39.1]           | 26.7<br>[20.7-36.8]         | 25.5<br>[19-39.1]         |
| Lung Cancer                      | 160                | 89         | 71         | 73<br>[36-89]         | 74<br>[42-86]         | 72<br>[36-89]         | 25.5<br>[14.5-44.4]         | 26<br>[14.5-42.6]           | 24.2<br>[16-44.4]         |
| Lymphoma                         | 68                 | 42         | 26         | 66<br>[18-85]         | 67<br>[18-85]         | 63<br>[18-80]         | 25.4<br>[19.4-45.4]         | 26.2<br>[19.8-45.4]         | 23.8<br>[19.4-38]         |
| Melanoma                         | 130                | 61         | 69         | 63<br>[25-92]         | 66<br>[25-88]         | 62<br>[27-92]         | 26.4<br>[17.6-38.6]         | 27.4<br>[21.8-38.6]         | 24.8<br>[17.6-36.8]       |
| NET                              | 2                  | 1          | 1          | 72<br>[68-76]         | 68                    | 76                    | 27.3<br>[25.2-29.4]         | 25.2                        | 29.4                      |
| Sarcoma                          | 14                 | 6          | 8          | 54<br>[25-84]         | 52<br>[25-70]         | 58<br>[40-84]         | 28<br>[19.8-40.4]           | 24.3<br>[20.6-33]           | 30.9<br>[19.8-40.4]       |
| Uro-genital cancer               | 88                 | 23         | 65         | 67<br>[26-88]         | 72<br>[37-85]         | 65<br>[26-88]         | 25.9<br>[17.9-50.2]         | 26.9<br>[19-34.7]           | 25.2<br>[17.9-50.2]       |
| <b>Total</b>                     | <b>592</b>         | <b>297</b> | <b>295</b> | <b>68<br/>[18-98]</b> | <b>69<br/>[18-88]</b> | <b>67<br/>[18-98]</b> | <b>25.6<br/>[14.5-50.2]</b> | <b>26.3<br/>[14.5-45.4]</b> | <b>24.8<br/>[16-50.2]</b> |

\*. Values presented as Median [range]

**Table 2: Characteristics of all 200 “most blurry” lesions for all reconstructions using 3 different thresholds for isocontouring**

|                                                       | Threshold SUV2.5 |             |             | SUV41%max   |             |             | SUV50%max   |             |             |
|-------------------------------------------------------|------------------|-------------|-------------|-------------|-------------|-------------|-------------|-------------|-------------|
|                                                       | UG               | BG          | DDG         | UG          | BG          | DDG         | UG          | BG          | DDG         |
| <b><i>SUV<sub>max</sub></i></b>                       | 8.29             | 9.50        | 9.43        | 8.29        | 9.50        | 9.43        | 8.29        | 9.50        | 9.43        |
|                                                       | [2.86-45.4]      | [2.88-47.3] | [3.01-47.1] | [2.86-45.4] | [2.88-47.3] | [3.01-47.1] | [2.86-45.4] | [2.88-47.3] | [3.01-47.1] |
| <i>P</i> value to UG                                  |                  | <0.0001     | <0.0001     |             | <0.0001     | <0.0001     |             | <0.0001     | <0.0001     |
| <i>P</i> value to BG                                  |                  |             | 0.98        |             |             | 0.996       |             |             | 0.87        |
| <b><i>SUV<sub>mean</sub></i></b>                      | 3.77             | 4.04        | 4.07        | 4.68        | 5.55        | 5.59        | 5.34        | 6.28        | 6.22        |
|                                                       | [1.19-12.8]      | [1.2-13]    | [1.19-12.9] | [1.54-26.4] | [1.64-27.0] | [1.64-27.0] | [1.75-28.4] | [1.83-29.1] | [1.37-29.0] |
| <i>P</i> value to UG                                  |                  | <0.0001     | <0.0001     |             | <0.0001     | <0.0001     |             | <0.0001     | <0.0001     |
| <i>P</i> value to BG                                  |                  |             | 0.02        |             |             | 0.45        |             |             | 0.95        |
| <b><i>Volume (mL)</i></b>                             | 4.28             | 3.81        | 3.77        | 2.61        | 1.72        | 1.72        | 1.26        | 0.97        | 0.95        |
|                                                       | [0.03-317]       | [0.05-313]  | [0.05-312]  | [0.13-132]  | [0.10-114]  | [0.09-113]  | [0.09-99.9] | [0.07-73.8] | [0.07-81.6] |
| <i>P</i> value to UG                                  |                  | <0.0001     | <0.0001     |             | <0.0001     | <0.0001     |             | <0.0001     | <0.0001     |
| <i>P</i> value to BG                                  |                  |             | 0.006       |             |             | 0.46        |             |             | 0.64        |
| SUV values and Metabolic volumes are median [range]   |                  |             |             |             |             |             |             |             |             |
| UG: Ungated; BG: Belt-gating; DDG: Data-driven gating |                  |             |             |             |             |             |             |             |             |

# "Most blurry" lesion

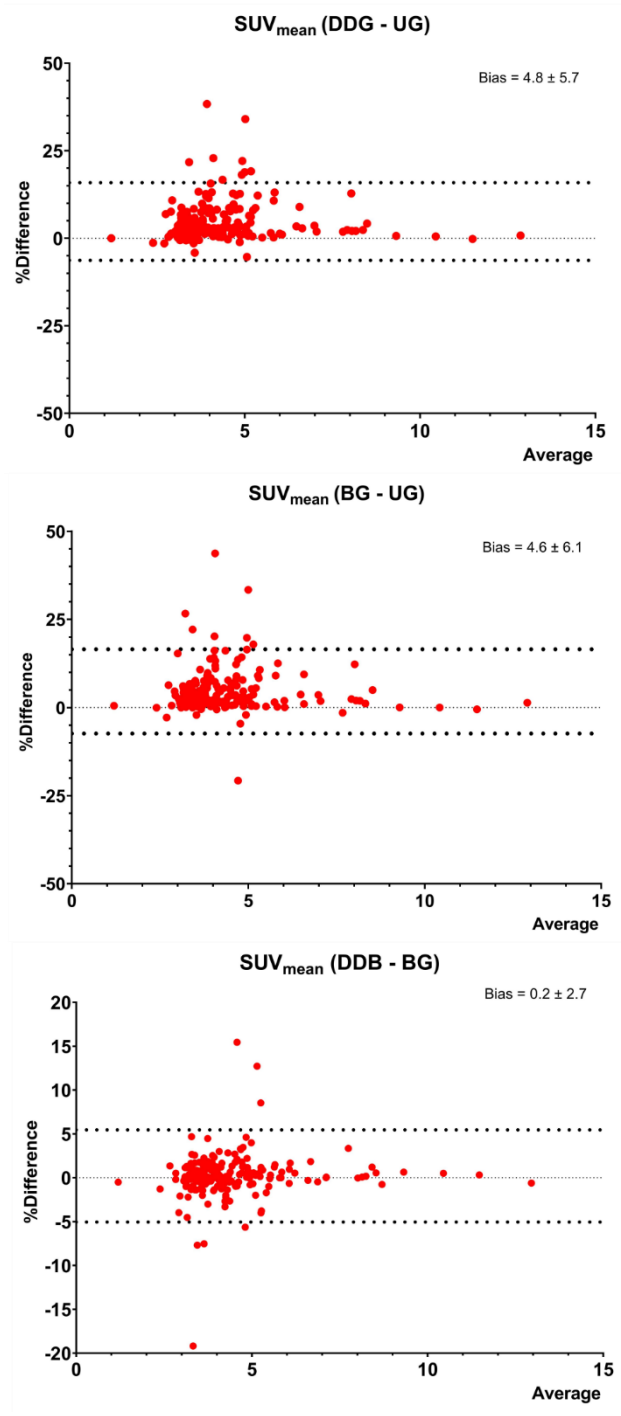

FIGURE.1. Bland-Altman plots of the “most blurry” lesion (N=200), representing the differences between SUV<sub>mean</sub> values.

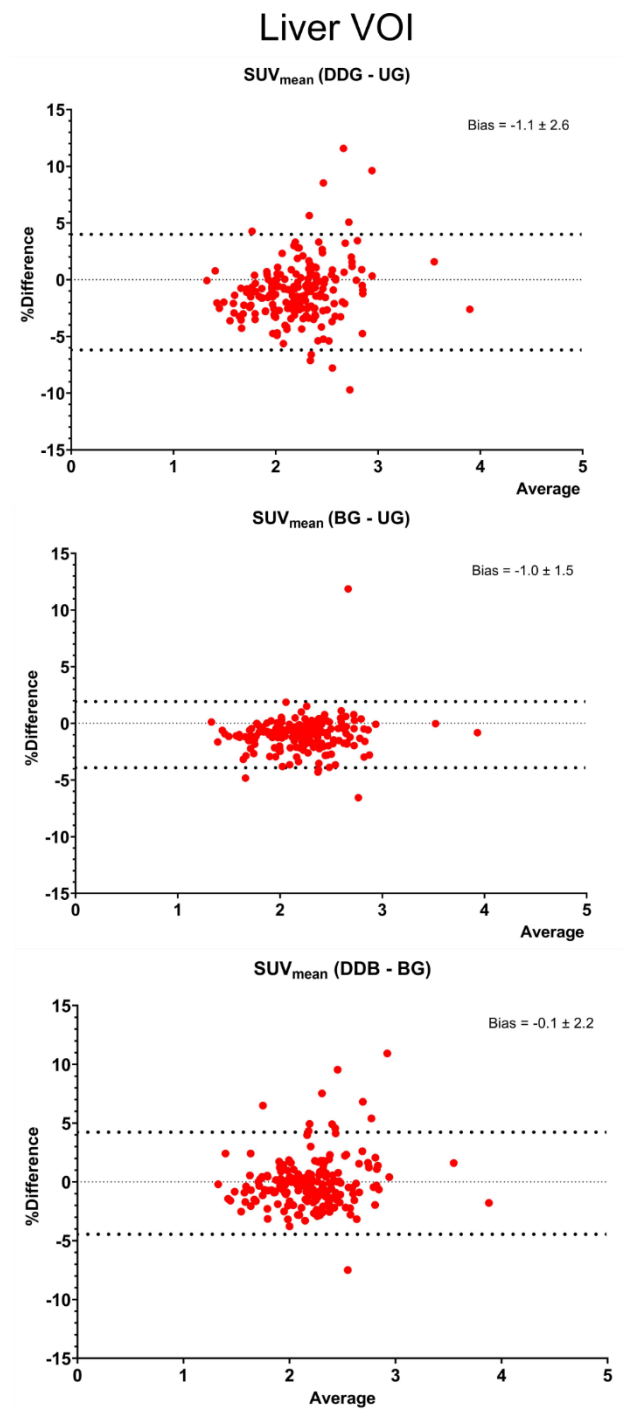

FIGURE.2. Bland-Altman plots for the fixed liver VOI, representing the differences between  $SUV_{mean}$  values. N=199 (one patient excluded due to artefact in liver region, see manuscript figure 4)
